# Supplementary material for: HIV-1 sequences in the epidemic suggest an alternative pathway for the generation of the Long Terminal Repeats
Source: PubMed Central journal article supplement (PMC5651808; doi:10.1038/s41598-017-14135-z), 2017-10-20
Supplement: 41598_2017_14135_MOESM1_ESM.pdf [file 41598_2017_14135_MOESM1_ESM.pdf]

## **HIV-1 sequences in the epidemic suggest an alternative pathway for the generation of the Long Terminal Repeats**

Pierre Cappy<sup>1,2,3\*</sup>, Alice Moisan<sup>2,3</sup>, Fabienne De Oliveira<sup>2</sup>, Jean-Christophe Plantier<sup>2,3</sup> and Matteo Negroni<sup>1</sup>

<sup>1</sup>Université de Strasbourg, CNRS, Architecture et Réactivité de l'ARN, UPR 9002, F-67000 Strasbourg, France; <sup>2</sup>Laboratoire de Virologie, Associé au Centre National de Référence du VIH, Hôpital Charles Nicolle, CHU de Rouen, Rouen, France; <sup>3</sup>GRAM EA2656, Faculté de Médecine-Pharmacie, Normandie Université, Rouen, France

## Supplementary information

**Table S1.** Recombinant strains retrieved and used in the study (HIV-1/MO, HIV-1/M CRFS and URFs).

| Identification | Type of recombinant | Reference                                               | GenBank accession number |
|----------------|---------------------|---------------------------------------------------------|--------------------------|
| 97CA-MP645     | HIV-1/MO            | Peeter et al., 1999, J virol                            | AJ239083                 |
| REC024         | HIV-1/MO            | Ngoupo et al., 2016, AIDS                               | KM438032                 |
| RBF208         | HIV-1/MO            | Vessièrè et al., 2010, AIDS                             | GQ351296                 |
| YBF274         | HIV-1/MO            | De Oliveira et al., 2017, Retrovirology                 | KX579838                 |
| REC107         | HIV-1/MO            | Ngoupo et al., 2016, 21th Int. AIDS Conf., 2016, Durban | N/A                      |
| BCF212         | HIV-1/MO            | N/A                                                     | KY359380                 |
| RBF222         | HIV-1/MO            | N/A                                                     | KY359382                 |
| RBF237         | HIV-1/MO            | N/A                                                     | KY359381                 |
| RBF240         | HIV-1/MO            | N/A                                                     | KY359384                 |
| subtype G      | CRF                 | Abecasis et al., 2008, J virol                          | N/A                      |
| CRF03_AB       | CRF                 | Liitsola et al.. 1998, AIDS                             | N/A                      |
| CRF08_BC       | CRF                 | Huang et al., 2013, J med primatol                      | KC914396                 |
| CRF12_BF       | CRF                 | Carr et al.. 2001,AIDS                                  | AF385934-6               |
| CRF26_AU       | CRF                 | Vidal et al.. 2009, AIDS Res Hum Retrov.                | N/A                      |
| CRF31_BC       | CRF                 | Santos et al.. 2006, AIDS                               | N/A                      |
| CRF32_06/A1    | CRF                 | Adojaan et al.. 2005, J AIDS                            | N/A                      |
| CRF42_BF       | CRF                 | Struck et al., 2015, AIDS Res Hum Retrov.               | EU170139                 |
| CRF45_cpx      | CRF                 | Niama et al.. 2009, AIDS Res Hum Retrov.                | N/A                      |
| CRF60_BC       | CRF                 | Simonetti et al.. 2013, Infect Genet Evol               | N/A                      |
| CRF71_BF       | CRF                 | Pessoa et al.. 2014, PLoS One                           | N/A                      |
| CRF87_cpx      | CRF                 | Hu et al.. 2016, AIDS Res Hum Retrov.                   | N/A                      |
| CRF88_BC       | CRF                 | Hu et al.. 2016, AIDS Res Hum Retrov.                   | N/A                      |
| URF_SHI        | URF                 | Shi et al., 2004, AIDS Res Hum Retrov.                  | AY445524                 |
| URF_CRN        | URF                 | Frangè et al., 2008, Retrovirology                      | EU448296                 |
| URF_AUK        | URF                 | Frangè et al., 2008, Retrovirology                      | EU448295                 |
| URF_WEI        | URF                 | Wei et al., 2013, AIDS Res Hum Retrov.                  | KC833436                 |
| URF_GUI        | URF                 | Gui et al., 2013, AIDS Res Hum Retrov.                  | KP170487                 |

N/A: not applicable

**Table S2.** Concordance of the Tat/TAR couple according to the concordance of *gag* and *nef*.

|                    | Tat=TAR | Tat≠TAR* | Total |
|--------------------|---------|----------|-------|
| discordant gag/nef | 4       | 4        | 8     |
| matching gag/nef   | 12      | 7        | 19    |
| <b>Total</b>       | 16      | 11       | 27    |

\*or presence of a recombination breakpoint in tat or R

H0: the two variables (Tat/TAR state and gag/nef state) are independent  
p-value = 0.6753 (Fisher's Exact Test for Count Data)

**Table S3.** Panel of reference sequences used for the recombination analyses.

| HIV-1/M subtype | Genebank accession number | HIV-1/M subtype | Genebank accession number |
|-----------------|---------------------------|-----------------|---------------------------|
| A1              | AF004885                  | D               | K03454                    |
| A1              | AM000053                  | D               | M22639                    |
| A1              | KT152840                  | D               | AB485648                  |
| A1              | EU861977                  | D               | JX236668                  |
| A1              | JX236677                  | D               | AB485650                  |
| A1              | AF413987                  | F1              | FJ771008                  |
| A1              | JX236669                  | F1              | AB485658                  |
| B               | AF042100                  | G               | AF084936                  |
| B               | DQ007903                  | G               | AB287004                  |
| B               | K03455                    | CRF01           | U54771                    |
| B               | AB731663                  | CRF01           | DQ859178                  |
| B               | AY423381                  | CRF01           | JX112869                  |
| B               | AF086817                  | CRF01           | AB253423                  |
| B               | EF363123                  | CRF01           | AB565504                  |
| C               | AF290028                  | CRF02           | L39106                    |
| C               | AB485643                  | CRF02           | AB231896                  |
| C               | EF469243                  | CRF02           | AB049811                  |
| C               | KC156210                  | CRF02           | AB485633                  |
| C               | KC156212                  | CRF02           | AB485636                  |
| C               | KC156212                  | HIV-1/O         | Genebank accession number |
| C               | KC156220                  | O               | L20587                    |
| C               | AY228557                  | O               | L20571                    |
| C               | AB254153                  | O               | AJ302647                  |
|                 |                           | P               | GU111555                  |

## Supplementary Figure S1

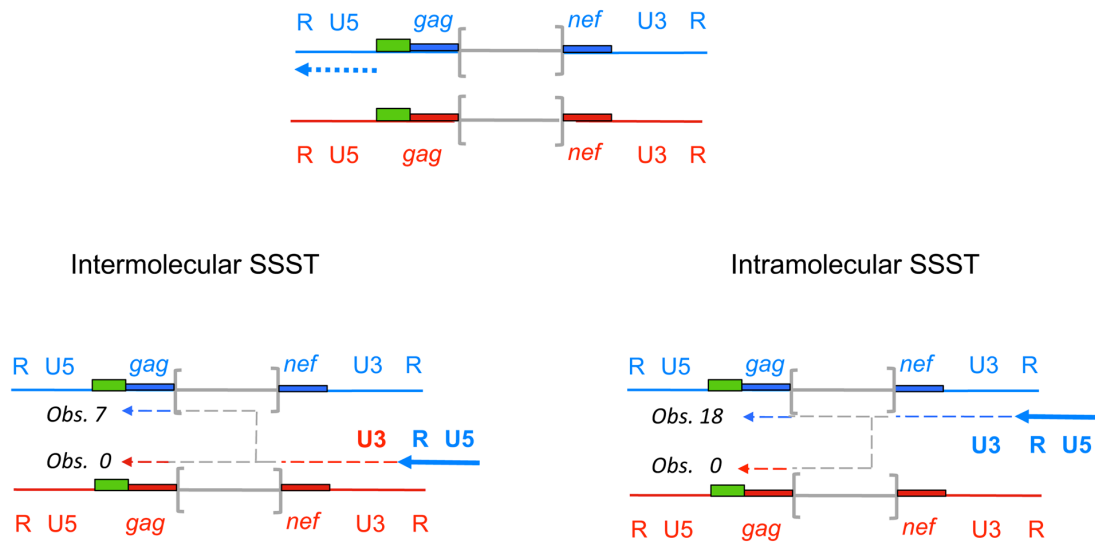

**Figure S1.** Pathways through which (-) DNA SSST should generate LTR with a U3/R breakpoint coupled to *discordant gag-nef* and non-recombinant LTRs coupled to *matching gag-nef*. The green rectangle represents the PBS, the boxes indicate the portions referred in the main text as *gag* and *nef* sequences for classifying proviruses into *matching gag-nef* or *discordant gag-nef*. To indicate whether they are phylogenetically matching or discordant, they are coloured in blue for the RNAs where reverse transcription is primed and in red for the other. The internal portion of the genome is drawn in grey, included in brackets. Upper drawing: synthesis of (-) strong stop DNA is indicated by a thick blue dotted arrow. Transfer of (-) strong stop DNA can then be either intermolecular or intramolecular<sup>5-6</sup>. In the case of intermolecular SSST, a breakpoint is generated in all cases at the U3/R junction. Depending on the number of template switching occurring during reverse transcription of internal regions, this can generate either *matching* or *discordant gag/nef* pairs. The number of cases observed in our analyses is indicated (Obs.).

**Supplementary Figure S2**

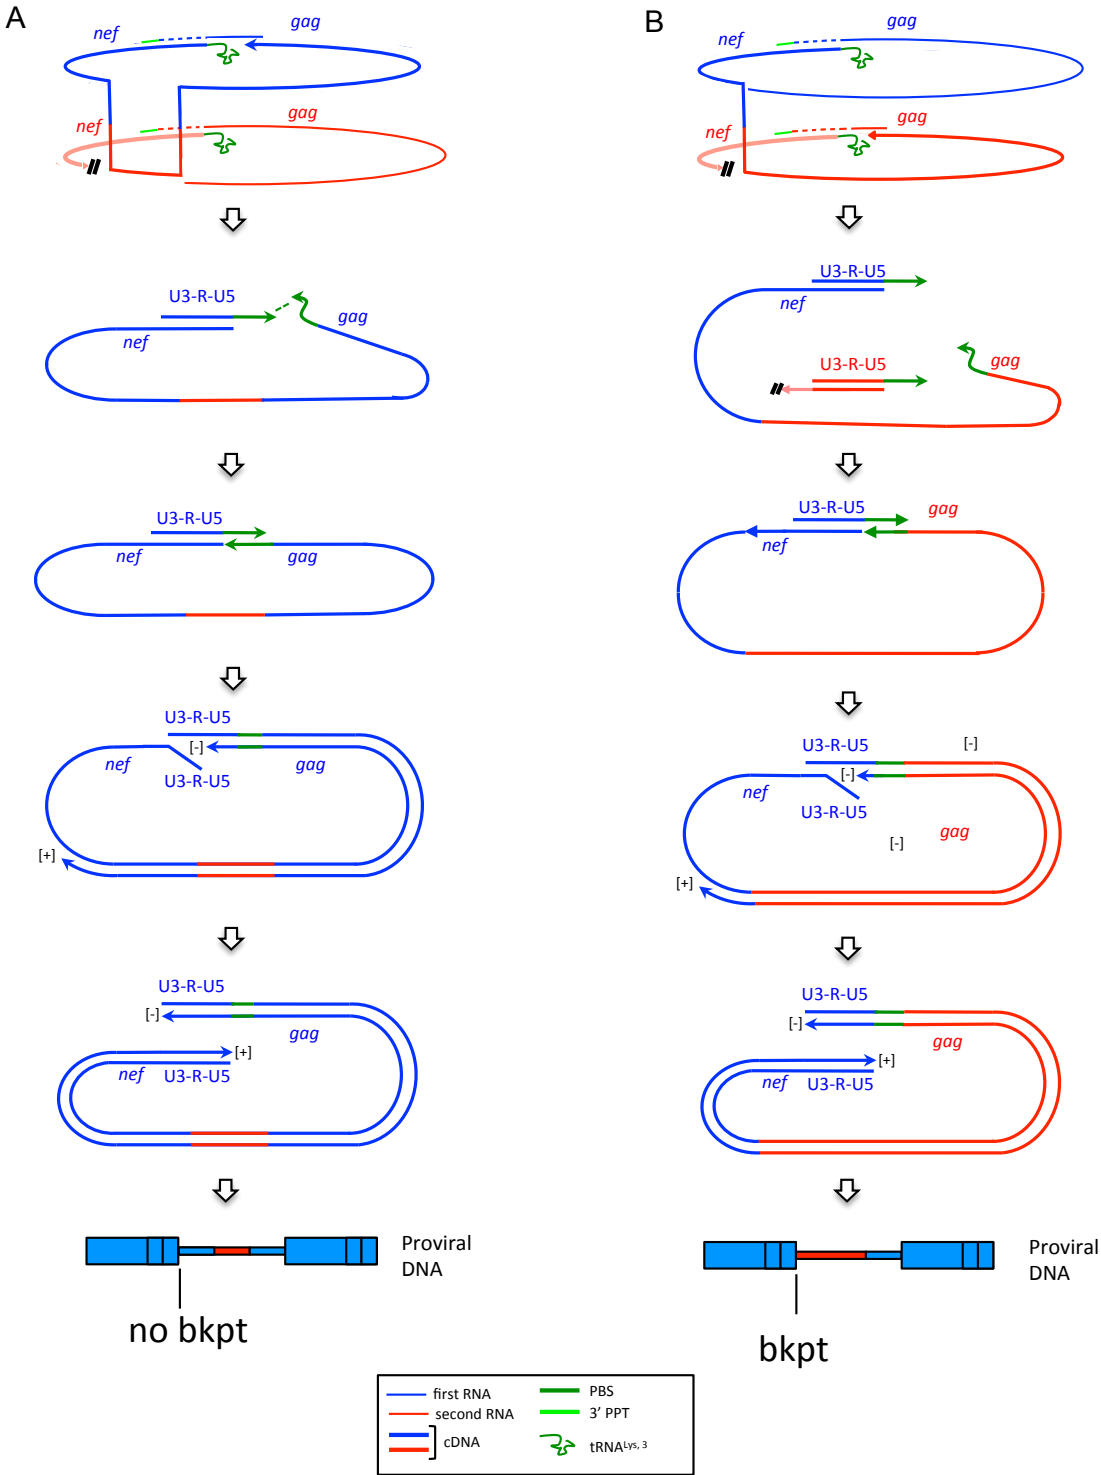

**Figure S2.** The description of the figure is the same as for Figure 4 of the main text. It shows that depending on the pattern of internal template switching, intramolecular (+) DNA SSST will not generate (column A) or it will generate (column B) a breakpoint at the U5/gag junction.

## Supplementary sequences

Sequences of the HIV-1/MO *nef*-LTR-MA concatenated sequences.

RBF208

ATGGGAAACGCATTGAGGAGAAGCCCATTTCCAGGATGGGCAGCAATAAGAGARAGAATAAGAA  
GARCTCCCCYCCCTGAGCCTGAACCATGTGCACCTGGAGTAGGACCAGTCTCCAGGGAATTAGC  
AGCTAGAGGAGGGATACCCAGTTCCTTTACTCCTCAAAAYAATGCAGCCCTTGCATTCTAGAAA  
GTCACCAAGAAGAAGAAGTAGGTTTCCCAGTAAGACCTCAAGTGCCTCTAAGRCCAATGACATAT  
AAACTAGCATTGACCTCAGTTTTTAAAGAAAAGGGGGGACTGGATGGGCTAATTTACTCCCCT  
GAKAAAGCAGAGATCCTAGATCTTTGGATACATCACACTCAGGGAATCTTCCCTGATTGGCAGTG  
TTACACACCAGGACCAGGAAGTACACTAACATTTGGGTGGTTATTTAAGCTAGTACCAG  
TGTCAAAAGAGGAGGCAGAAGCACTAGGAAACACAAGTGAAGGGGCTAACCTACTGCATCCAGC  
TTGCAGCCATGGCTTTGGAGACGCACACGGAGAGATACTGAAATGGCAGTTTGATAGATCATTAG  
CCAACACCCATGTTGCTATGATAACCAACCCTGAGCTCTTCAACAAGGACTAAAAGTCTGACAT  
GAAGATAGCTGACGCTGCGGGACTTTCCAACAGAGACTGCTGACACTGCGGGGACTTTCCAGTG  
TGGGAGGGACAGGGGCGGTTCCGGGAGTGGCTAACCCCTCAGATGCTGCATATAAGCAGCCGCT  
TTCTGCTTGACCGGGTCTCGGTTAGAGAACCAGGTCTGAGCCCGGGAGCTCCCTGGCCTCTAG  
CTGAACCCGCTGCTTAACGCTCAATAAAGCTTGCCTTGAGTGAGAAGCAGTGTGTGCTCATCTGT  
TCAACCCTGGTATCTAGAGATCCCTCAGATCACGTAGACTGAGGYAGAAAATCTCTAGCAGTGGC  
GCCCCAACAGGGACCGGAAAGAGAAAAGTGAACCAGGGAAGAAAACCTCCGACGCAACGGGCT  
CGGCTTAGCGGAGTGCACCCGCTAAGAGGGCGAGAGGACTCACAGAAGGGGTGAGTAAWTTTGC  
TGGCGGTGGCCAGACCTAGGGGAAGGGCGAAGTCCCTAGGGGAGGAAGATGGGTGCGAGTGC  
GTCTGTGTTGAAAGGGAGCAAATTGGATGCATGGGAACAAATTAGGTTAAAGCCAGGATCTAAAA  
AGAAATATCAATTAACATTTAGTATGGGCAAGCAGGGAGCTGGACAGATACGCATGTAATCCT  
GAGCTATTAGAACTATAGAGGGTAACGAGAACTATTACAGCAGTTAGAGCCAGCTCTCAAGAC  
AGGGTCAGACAGCCTGCAGTCACTCTGGAACACAATAGCAGTGCTCTGGTGTGTTACAACAGA  
TATARAGTTGAAGACACACAGCAGGCGATACAAAAGTTAAAGGAAGTAATGGGGAGCAGGAAGT  
CTGCAGAGGTCGCTAAGGAAGACACAGGCGAAAGGCAGAGGGGTCAAATTAC

RBF222

ATGGGTRGCAAGTGGTCAAAGGTAGCTTTGTGGGATGGYCTCAGGTTATGGAAAGAATAAGRC  
AAACTCCTCCGAGGCAAACCTCCAGCAGCAACAGGAGTGGGAACAGTATCTCAAGATTTAGGT  
AGACATGGAGCAATCACAAGCAGTAATACAGCARCTACTAATGCTGCCTGTGCCTGGCTAGAAGC  
ACAAGAAGACGAGGAGGTAGGCTTTCCAGTCAGGCCGCGAGGTACCTTTGAGACCAATGACTTTT  
AAGGCAGCRTTGTATCTCAGCCACTTTTTAAAGAAAAGGGGGGACTGGATGGGTTAATTTACTC  
CAAGAAAAGACAAGAGATCCTTGATCTGTGGGTCTATCACACACAAGGATTCTTCCCAGATTGGC  
AGAACTACACACCAGGACCAGGGACTAGATTCCCCTGACCTTTGGGTGGTGTTCAGCTAGAA  
CCRATGGATCCAGCAGAGGTAGAGGAAGCCAATAAAGGAGAGAACAATAGTTTATTACACCCCAT  
CTGTCAGCATGGAATGGAGGACGAGGACAGAGAAGTGTGCTGGTCTGGAGATTTGACAGCCACCTG  
GCATGGAAACACAKCGCTCGAGAGCTGCATCCGGAGTTCTACAAAGACTGCTGACACAGAAGTT  
GCTGACAGGGACTTTCCGCTGGGACTTTCCGGGGGAGGTGTGGCTTGGGAGGAGTTGGGGAGT  
GGCTAACCCCTCAGAWGCTGCATATAAGCAGCCGCTTCTCGCCTGTACTGGGTCTCTCTTYTAG  
ACCAGATTTGAGCCTGGGAGCTCTCTGGCTAGCAGGGAACCCACTGCTTAAGCCTCAATAAATTC  
AAGTAGTGTGTGCCCGTCTGTTGTGTGACTCTGGTAACTAGAGATCCCTCAGACCTTTCTAGTCT  
GTGTAAAAAATCTCTAGCAGTGGCGCCCCGAACAGGGACCTTTAAATWAATAGGGACTCGAAAGC  
GAAAGTTCCARAGAARATCTCTCGACGCAGGGACYCGGCTGGCTGAGGTGCACGCAGCAAGAG

GCRAGAGCGGCRACCTGGTGTAGTACGCCAAAAAATTTGACTAGCGGAGGCTARAAGGARARARAT  
GGGTGCGAGAGCGTCAGTGTTAAGTGGGGGAAAATTAGATACATGGGAAAGAATTCGCTTAAGG  
CCAGGGGGAAAAGAAAAAATATAAACTAAAACATATAGTATGGGCAAGCAGGGAGTTGGAAAGATT  
TGCACTTAACCCTGGCCTTTTAGAATCAGCAGAAGGATGTCAACAGTTAATGGAACAGTTACAGT  
CAACTCTCAAGACAGGATCAGAAGAACTTAAATCATTATTTAATACCTTAGCAGTCCTTTGGTGCG  
TRCATCAAAGGATGGACATAAGAGACACCAAGGAAGCCTTAGATAAACTAGAGGAAGCGCAAAT  
AAGAGCAAAGCAAAGGAACAGCAGGCAACAGCTAGCGCAAGCTGCAGCCAAAATTAC

REC107

ATGGGGAATGCATGGAGTAAAAGTAAATTTGCAGGATGGTCAGCAGTAAGAGAGAGAATGAGGA  
AAACCCCCACTAATAATCCTGAACCATGTGCACCTGGGGTAGGAGAAATCTCTAGACAGTTAGCA  
GCTAGAGGAGAAATACCAGGTTCCCTATACTCTTCATAACAATGCAGCCTTGGCCTTCCTAGAAGA  
ACATGAAGAGGGTGAAGAAGTAGGGTCCAGTAACACCTCMAGTGCCTCTTAGGCCAATGACC  
TATAAAGGAGCATTGACCTCGGCTTCTTTTTAAAAGAAAAGGGAGGACTGGATGGGTTGATTTA  
CTCCATAAAAAGAGCAGAGATCCTAGATCTTTGGGTGTATCRCACTCAGGGCTACTTCCCTGATT  
GGCAGAACTACACACCAGGACCAGGAACCAGATACCCATTGACATTTGGATGGCCATTCAAGCTA  
GTGCCAGTATCAGCAGAAGAGGCAGAAAGACTGGGCAATATGTGTGAAAGGACTACGCTCCTAC  
ATCCAATCAGTAATCATGGTAGTGAAGATGAACATGGGGAAATACTGAAATGGCAGTTTGATAGTT  
CAYTGGGCCGCACCCATGTTGCTTTAATAACTCACCTCATCTTCAACAAGGACTAAAATGTT  
TATCTGAAGAGTGCTGACACTGCGGGACTTTCCAGCAGAGACTGCTGACGCGGGCGGGGACTTTC  
CAGTGTGGGAGGGATAAGGGCGGTTCCGGGAGTGGCTAACCTCAGATGCTGCATATAAGCAG  
CTGCTTCTCGCTTGTACTGGGTCTTTTTGCTAGACCAGATTGGAGCCTGGGAGCTCTGGCTA  
GTAGAGGAACCCACTGCTTAAGCCTCAATAAAGCTTGCCCTGAGTGCTTCAAGTAGTGTGTGCC  
ATCTGTTGTGTGACTCTGGTATCTAGAGATCCCTCAGACCACTCGAGACTGTGTAAAAATCTCTAG  
CAGTGGCGCCCGAACAGGGACCCTAATAGGGACTCGAAAGCGAAAGTTCCAGAGAAGTTCTCTC  
GACGCACGGACTCGGCTTGTGAGGTGCACACAGCAAGAGGCGAGAGCGGCGACTGGTGAGTA  
CGCCAATTTTTGACTAGCGGAGGCTAGAAGGAGAGAGATGGGTGCGAGAGCGTCAGTGTTAAGT  
GGGGGAAAATTAGATGCGTGGGAGAAAATTCGGTTACGGCCAGGGGGAAAAGAAAAAATATAGAC  
TAAAACATTTAGTATGGGCAAGCAGGGAGCTGGAAAGGTTCCGCACTCAACCCTGGTCTTTTAGAA  
ACATCAGAAGGGTGCCAACAATAATGGAGCAGTTACAATCAACTCTCAGAACAGGATCAGAAGA  
ACTTAAGTCATTGTTAATAACAATAGCCACCTTTGGTGTGTACATCAAAGGATAGATATTAAGA  
CACCAAGGAAGCCTTAGATAAAAATAGAGGAAGTGA AAAAATAAGAACAAGCAAAGACACAGCAAG  
CAGCCGCCGCAGGAAGCGGCAGCCAAAATTTT

YBF274

ATGGGTAACAAATGGTCAAAAAGTAGTATAGTGGGATGGCCTGCCATAAGGGAAAGAATAAGAAG  
AACTAATCCAGCAGAAAATCCAGCAGCAGATGGGGTAGGAGCAGTATCACAAGACCTGGCAAAA  
CATGGGGCAATCACAAGTAGCAATACAAAACATACTAATGCTGCCTGTGCCTGGCTAGAAGCACA  
AGAAGAAGAGGGGGTGGGTTTTCCAGTCAAACCTCAGGTACCTCTAAGACCAATGACCTACAAG  
GGAGCTTTAGATCTTAGCCACTTTTTAAAAGAAAAGGGGGGACTGGAAGGGCTAGTTCACTCCCA  
AAGAAGACAAGAGATCCTTGATCTTTGGGTCTACCACACACAAGGCTACTTCCCTGATTGGCAGA  
ACTACACACCAGGGCCAGGAACCAGATACCCACTATGCTTTGGGTGGTGCTTCGAGCTAGTACC  
AGTTGATCCAAAGGTGGTAGAAGAAGAGACTGAAGGAGAGAGCAATTGTTTGCTACACCCATAA  
GCCAGCATGGAATGGATGACTCGGAGAGAGAAGTATTAGTGTGGAGATTTAACAGCAGACTAGC  
ATATGAACACAAGGCCAGAGAGAAGCATCCGGAGTTCTTTAAAGACTGCTGACACCGAGTTCTTA  
AAGACTGCTGATACTGAGCTTTCTACAAGGGACTTTCCGYTGGGGACTTTCCAGAGGAGGCGTG  
ACTGGGGAGGGACTGGGGAGTGGCCAACCTCAGATACTGCATATAAGCAGCCGCTTTCTGCTT  
GTACCGGGTCTCGGTTAGAGAACCAGGTCTGAGCCCGGGAGCTCCCTGGCTTCTCAATAAAGCT



TGCCTTGAGTGAGAAGCAGTGTGTGCTCATCTGTTCAACCCTGGTGTCTAGAGATCCCTCAGATC  
ACGTAGACTGAAGCAGAAAAATCTCTAGCAGTGGCGCCYGAACAGGGACCAGAAAAGAGAAAGTG  
AAACCAGGGAAGAAAACCTCCGACGCAACGGGCTCGGCTTAGCGGAGTGCACCCGCTAAGAGG  
CGAGAGGAACTCACAGAAGGGTGAGTAACTTGCTGGCGGTGCCAGACCTAGAGGAAGGGCG  
AAGTCTCTAGGGGAGGAAGATGGGTGCGAGAGCGTCTGTGTTGACAGGGAGTAAATTGRATGCA  
TGGGAACAAATTAGGTTAAAGCCAGGATCTAAAAAGAAATATAGACTAAAACATTTAGTATGGGCA  
AGCAGGGAGCTGGAAAGATWTGCTTGTAACTCCTGAGCTACTAGAACTGCAGAAGGCAATGAGA  
AACTGWTACAACAGTTAGAACCAGCTCTCAAGACAGGGTCAGAAAAGCCTRCAATCACTCTGGAA  
CGCAATAGTAGTCTGGTGTGTTTATAACAGATATAAAGTTGAAGATACGCAGCAGGCAATAC  
AAAAGTTAAAGGAAGTAATGGGGAACAGGAAGCCYGCGRGTGYCGCTAAGGAAGACACTAGCAC  
AARGCAGATGGGTCAAACACTAC

BCF212

ATGGGCAGCAAGTGGTCAAAAAGCAGCATAGTAGGATGGCCTGAGGTTAGGGAAAGAATGAGAA  
GGACTCCTCCACATAAATACTCCTCCAACCTCCAGCAGCAGTAGGAGTAGGAGCAGTATCTCAA  
GATTTAGCTAGACATGGAGCAATCACAAGCAGTAATACAGCTCACACTAATGCTGACTGCGCCTG  
GCTGGAAGCACAAGAAGAAGAGGAGGTAGGCTTCCAGTCAGGCCACAGGTACCTTTAAGACCC  
ATGACTTATAAAGCAGCTGTAGATCTCAGTCACTTTTTAAAAGAAAAGGGGGGACTGGATGGGTT  
AATTCACCTCCAGGAGAAGACAAGACATCCTTGATCTGTGGGTCTACCACACACAAGGATACTTCC  
CTGATTGGCAGAATTACACGCCAGGGCCAGGGACCAGATTCCCACTAACATTTGGGTGGTGCTT  
CAAGCTAGTACCAGTAGATCAAGAGGAAGTAGAGGAGGCCACTAGGGGAGAGAAACAACAGCCTG  
TTACATCCTATATGCCAACATGGAATGGATGATGATGAGAGAGAAGTGTTAAAGTGGCAGTTTGA  
CAGCCGCCTGGCCCTAAGACACTTCGCTAGAGAAAAGCATCCGGAGTTCTACAAAAGACTGCTGA  
CACAGAAGTTGCTGACTGGGACTTTCCGCTGGGGACTTTCCAGGGGAGGTGTGGTTTGGGCGG  
AGTTAAGGAGTGGCTAACCTCAGATGCTGCWTATAAGCAGCCGCTTTTCGCTTGTACTGGGTCT  
CTCTTGTTAGACCAGATCGAGCCTGGGAGCTCTCTGGAAGTAGCGAGAGAACCCTGCTTAAG  
CCTCWATAAGCTTGCCATTGAGTGAGAAGCAGTGTGTGCTCATCTGTTCAACCCTGGTGTCTAGA  
GATCCCTCAGATCACTTAGACTGAAGCAGAAAATCTCTAGCAGTGGCGCCGAACAGGGACTTG  
AAAGAGAAAAGTGAACCAGGGAAGAAATCCTCCGACGCAACGGGCTCGGCTTAGCGGAGTGCA  
CCCGCTAAGAGGCGAGAGGAACTCACAGGGGTGAGTAAAATTGCTGGCGGTGCCAGACCTAG  
GGGAAGGGCGAAGTCTCTAGGGGAGGAAGATGGGTGCGAGAGCGTCTGTGTTAAGGGGAAGTA  
AATTGGATGCATGGGARCAAAATTAAGTTGAAGCCAGGATCTAAAAGACATATAGACTAAAACATT  
TAGTTTGGGCAAGCAGGGAGCTGGACAGATTTCGCATGTAATCCTGAGCTACTAGAAAATGCAGA  
GGGTAATGAGCAACTGTTACAACAGTTAGAACCAGCTCTCAAGACAGGGTCAGAAAAGCCTGCAG  
TCACTCTGGAACACAATAGCAGTGTCTGGTGTGTTCAACAAAGAATTAGAGTTGGAGATACGCA  
GCAGGCAGTACAAAAGTTAAGGGAGGAAATGGAGAAAAGGAAGCCTAAAATACTGCTAAGGAA  
GACACAACTCAAGGCAGACAGGTCAAATTAC

RBF237

ATGGGTRGCAAGTGGTCAAAAAGCAGTATAGTTGGATGGCCTGCTGTAAGGGAAAGACTAAGAC  
AAACCCCTGTAGCAGCAGAKGGGGTGGGAGCAGTGTCTCAAGATTTAGATAAACATGGGGCAAT  
TACAAGCAACAATACTAGGGCTACCAATGCTGACTTGGCCTGGCTGGAAGCGCARGAGGATGAG  
GACGTAGGTTTTYCCAGTCAGACCTCAGGTACCTTTAAGGCCAATGACTTATAAAGCAGCTGTGCA  
TCTCAGCCACTTTTTAAAAGAAAAGGGGGGACTGGATGGGTTAACTTACTCCAGGAGAAGAAAAG  
AAATCCTTGATTTGTGGGTCTACCACACACAAGGCTTCTTCCCTGACTGGCAGTGTACACACCA  
GGGCCAGGAACYAGGTTCCCACTGACCTTTGGATGGTGCTTCAAGCTAGTACCAGTTGATCCAG  
AGGAAGTAGAAAGGGCYAATGAAGGAGAGAACTGTTTATTACATCCTATGAGCCTACATGGA  
ATGGAGGACGACGACARGGAAGTGTAAAGATGGAAGTTTGACAGCACCCCTAGCACTGAGACT

TAGCCAAAGAGAAACATCCGGAGTACTACAAAGACTGAGAAACTGCTGACACAGAAGATCCTAAA  
AGGGACTTTCCACTGGGGACTTTCCAGAAGGGCGTACCCAAGGGCGGGACCGGGGAGTGGCTA  
MCCCTCAGATGCTGCATATAAGCAGCTGCTTTTCGCCTGTACTGGGTCTCTCTTGCTARACCAGA  
TTTGAGCCTGGGAGCTCTCTGACTAGCAGGGAACCCACCTTGCCTTGAGTGCTTCAAGTAGTGT  
GTGCCCGTCTGTTGTGTGACTCTGGTAACTAGAGATCCCTCAGACCACTCTAGATAGTGTA AAAA  
TCTCTAGCAGTGGCGCCCGAACAGGGACTTGAAAGTGAAAGTTAATAGGGACTCGAAAAGCGAAA  
GTTCCAGAGAAGATCTCCCGACGCAGGACTCGGCTTGCTGAGGTGCACRCAGCAAGAGGCGAG  
AGCGGCGACTGGTGAGTACGCCAATTTTTGACTAGCGGAGGCTAGAAGGGGAGAGATGGGTGC  
GAGAGCGTCTGTRTTGT CAGGAAGCAAATTGGATGCATGGGAACAAATTAGGTTAAAGCCAGGAT  
CTAAAAAGAAATATAGGCTAAAACATTTAGTATGGGCAAGCAGGGAGCTGGACAGATTGCTTGT  
AATCCTGAGCTACTAGAACTGCAGAGGGTAATGAGAACTGTTACAACAGTTAGAGCCAGCTCT  
TAAGACAGGGTCAGAAAGCCTGCAGTCACTCTGGAACACAATAGCAGTGCTCTGGTGTGTTCCACA  
ATAGATTTAARGTTGAAGAYACACAGCAGGCAATACAAAAGCTAAAACAAGAAAAGGGGAAGTCT  
GTGGGTACCGCTAAGGAAGACACAAGCGCAAGGCAGACAGGTCAAATTAC

RBF240

ATGGGGAACGCATTTAAGAAAAGYAGCTTTGTRGGATGGCCAGCAGTAAGAGAAAAGAATAAGAR  
GAGCTCACAAAGGAGCCTGAACCTGAACCATGTGCACCKGGAGTGGGAGAACTCTCCAGGGCRG  
TAGCAAATAGAGGAGGGATACCAAGTTCCTTTACTCCTCAAAAACAATGCAGCCCTTGCAATCCTA  
GAAAGTCACCAAGAAGATGAAGAGGGAGTAGTTTTCCAGTCAAACCTCAAGTACCTGTAAGGC  
CAATGACCTATAAAGGAGCATTGACCTCAGCTTCTTTTTAAAAGAAAAGGGAGGACTGGATGGG  
TTAATTTACTCAACTAAGAGAGCAGAGATCCTGGATCTTTGGGTGCATCACACTCAGGGATTCT  
CCCWGATTGGCAGA ACTACACACCAGGACCAGGA ACTAGATACCCACTGACATTTGGATGGTTG  
TTTAAACTAGTACCAGTGT CAGAAGCTGAGGCAGAAGACATGGGCACTGAAGGTGACAACGCTA  
GTCTCCTACATCCAGCTTGTGATCATGGCTTTGAAGATCCACACGGAGAAATACTGAAATGGCAG  
TTTGATAGAACATTAGGCWTCATCATGTTGCTCAGAGAACCACCCAGAGCTCTTCTCTAAGGA  
CTAAACTGCTAACTGAAGATTGCTGACACCGCGGGACTTTCCAGYAGAGACTGCTGACMCTGC  
AGGGACTTTCCAGCGTGGGAGGGATAAAGGGCGGTCCGGGGAGTGGCTAACCTCAGAAGCTG  
CATATAAGCAGCCGCTTTCTGCTTGTACTGGGTCTCAGTTAGAGAACCAGGTTAGAGCCCGGA  
GCTCCCTRGCCTCTGGCTGAACCCACTGCTTAACGCTCAATAAACTTGCCTTRMGTGAGAAGCA  
GTGTGTGCTCATCTGTTCAACCCTGGTAGCTAGAGATCCCTCAAATCACGTAAACTGAAGCAGAA  
AAATCTCTAGCAGTGGCGCCC GAACAGGGACGCTGAAAGAGAAAGTGAACCAGGGAAGAAAAC  
CTCCGACGCAACGGGCTCGGCTTAGCGGAGTGCACCTGCTAAGAGGCGAGAGGAGCTCACAGA  
GGGTGAGTAAATTTGCTGGCAGGTGGCCAGACCTAGGGGAAGGGCGAAGTCCCTAGGGGAGGA  
AGATGGGTGCGAGAGCGTCAGTGTTAAGGGGAAGCAAATTGRATGCATGGGAACAAATTAGGTT  
RAAGTCAGGATCTAAAAAGAMATATCAGCTAAAACATTTAGTATGGGCAAGCAGGRAGCTGRATA  
RATTCGCATGTAATCCTGAGCTTCTAGAACTGTAGAGGGAACTGARAAATTATTACAACAGCTAG  
ARCCAGCTCTCAAGACAGGGTCAGAAAGCCTGCAGTCACTCTGGAACACTATAGCAGTGCTCTG  
GTGTGTT CATAACA ACTTTAGAGTAGGAGATACGCAGCAGGCAATACAAAAGTTACAAGAAGAAA  
TGAAGAAAAGGAAACCTGTAGATACTGCTAAGGAAA ACTCAAGGCAGACAGGTCA
